# Supplementary material for: Major and trace element partitioning between dissolved and particulate phases in Antarctic surface snow
Source: Royal Society of Chemistry journal article supplement (doi:10.1039/c1em10215j), 2011-01-01
Supplement: c1em10215j.pdf [file c1em10215j.pdf]

| <b>Table S1. ICP-MS instrumental parameters</b> |                                                                                                                                                                                                                                                                                                   |
|-------------------------------------------------|---------------------------------------------------------------------------------------------------------------------------------------------------------------------------------------------------------------------------------------------------------------------------------------------------|
| RF Power                                        | 1400 W                                                                                                                                                                                                                                                                                            |
| Plasma gas flow rate                            | 14.5 l min <sup>-1</sup>                                                                                                                                                                                                                                                                          |
| Auxiliary gas flow rate                         | 1.65 l min <sup>-1</sup>                                                                                                                                                                                                                                                                          |
| Nebulizer                                       | PFA-ST microconcentric                                                                                                                                                                                                                                                                            |
| Spray chamber                                   | single pass, heated at 70°C                                                                                                                                                                                                                                                                       |
| Nebulizer gas flow rate                         | 0.8 l min <sup>-1</sup>                                                                                                                                                                                                                                                                           |
| Sheathing gas flow rate                         | 0.1 l min <sup>-1</sup>                                                                                                                                                                                                                                                                           |
| Sample uptake rate                              | 20 µl min <sup>-1</sup>                                                                                                                                                                                                                                                                           |
| Injector tube                                   | Quartz (2.0 mm id)                                                                                                                                                                                                                                                                                |
| Sampler cone                                    | 1.1 mm diameter Pt                                                                                                                                                                                                                                                                                |
| Skimmer cone                                    | 0.9 mm diameter Pt                                                                                                                                                                                                                                                                                |
| RF amplitude                                    | 150 V                                                                                                                                                                                                                                                                                             |
| Axial field voltage                             | 300 V                                                                                                                                                                                                                                                                                             |
| Cell path voltage                               | -28 V                                                                                                                                                                                                                                                                                             |
| Cell rod offset                                 | -8.0 V (standard)<br>-1.0 V (DRC)                                                                                                                                                                                                                                                                 |
| Mass analyzer rod offset                        | 0.0 V (standard)<br>-8.0 V (DRC)                                                                                                                                                                                                                                                                  |
| Reaction gas                                    | NH <sub>3</sub>                                                                                                                                                                                                                                                                                   |
| Reaction gas flow rate                          | 1.0 ml min <sup>-1</sup> (Fe)<br>0.4 ml min <sup>-1</sup> (Cr,Mn,V)                                                                                                                                                                                                                               |
| Stability parameters <sup>a</sup>               | RPa=0.0<br>RPq=0.25 (standard)<br>RPq=0.60 (DRC)                                                                                                                                                                                                                                                  |
| Dwell time                                      | 50 ms (100 ms for Fe)                                                                                                                                                                                                                                                                             |
| Sweeps                                          | 20                                                                                                                                                                                                                                                                                                |
| Replicates                                      | 10                                                                                                                                                                                                                                                                                                |
| Measured ions                                   | <sup>51</sup> V <sup>+</sup> , <sup>52</sup> Cr <sup>+</sup> , <sup>55</sup> Mn <sup>+</sup> , <sup>56</sup> Fe <sup>+</sup> , <sup>59</sup> Co <sup>+</sup> ,<br><sup>63</sup> Cu <sup>+</sup> , <sup>64</sup> Zn <sup>+</sup> , <sup>114</sup> Cd <sup>+</sup> , <sup>208</sup> Pb <sup>+</sup> |

Note: <sup>a</sup> Mathieu stability parameters of the cell's quadrupole:  
a=1.9\*RPa; q=0.95\*RPq.

---

**Table S2.** ICP-AES instrumental parameters

---

|                               |                                                                                                                                                                                                                                                  |
|-------------------------------|--------------------------------------------------------------------------------------------------------------------------------------------------------------------------------------------------------------------------------------------------|
| RF Power                      | 1100 W                                                                                                                                                                                                                                           |
| Plasma gas flow rate          | 15.0 l min <sup>-1</sup>                                                                                                                                                                                                                         |
| Auxiliary gas flow rate       | 1.5 l min <sup>-1</sup>                                                                                                                                                                                                                          |
| Nebulizer                     | concentric K-style                                                                                                                                                                                                                               |
| Spray chamber                 | cyclonic                                                                                                                                                                                                                                         |
| Nebulizer gas flow rate       | 0.75 l min <sup>-1</sup>                                                                                                                                                                                                                         |
| Sample uptake rate            | 0.78 ml min <sup>-1</sup>                                                                                                                                                                                                                        |
| Internal standard uptake rate | 0.22 ml min <sup>-1</sup>                                                                                                                                                                                                                        |
| Integration time              | 15 s                                                                                                                                                                                                                                             |
| Replicates                    | 7                                                                                                                                                                                                                                                |
| Selected wavelengths (nm)     | Al (236.705; 237.312; 396.152); Ca (315.887; 370.602; 373.690); Fe (234.350; 240.489; 258.588); K (766.491; 769.897); Lu (291.139); Mg (279.550; 280.270; 285.213); Na (568.821); Sr (346.445; 407.771; 421.552); Zn (202.548; 206.200; 213.857) |

---

**Table S3.** Analysis of the certified reference material MURST-ISS-A1 <sup>a</sup>

|    | Certified    | Found       |
|----|--------------|-------------|
| Al | 67100±3300   | 67000±4400  |
| Ca | (17236±1202) | 19500±500   |
| Cd | 0.538±0.027  | 0.653±0.077 |
| Co | 6.87±0.31    | 7.94±0.69   |
| Cr | 42.1±3.4     | 39.8±3.7    |
| Cu | (5.79±1.59)  | 5.00±0.61   |
| Fe | 24400±700    | 24500±1400  |
| K  | (30289±4325) | 27200±1500  |
| Mg | (15200±1292) | 11700±900   |
| Mn | 446±18       | 460±34      |
| Na | (21390±1547) | 20200±1600  |
| Ni | 9.56±0.04    | 10.3±0.7    |
| Pb | 21±3         | 18±1        |
| Sr | (217±1)      | 223±13      |
| V  | (47.0±5.7)   | 51.4±3.7    |
| Zn | 53.3±2.7     | 56.3±4.2    |

Note: <sup>a</sup> mean values ± SD (n=8); values in µg g<sup>-1</sup>.  
Indicative values in brackets.

1  
2  
3  
4  
5  
6  
7  
8  
9  
10  
11  
12  
13  
14  
15  
16  
17

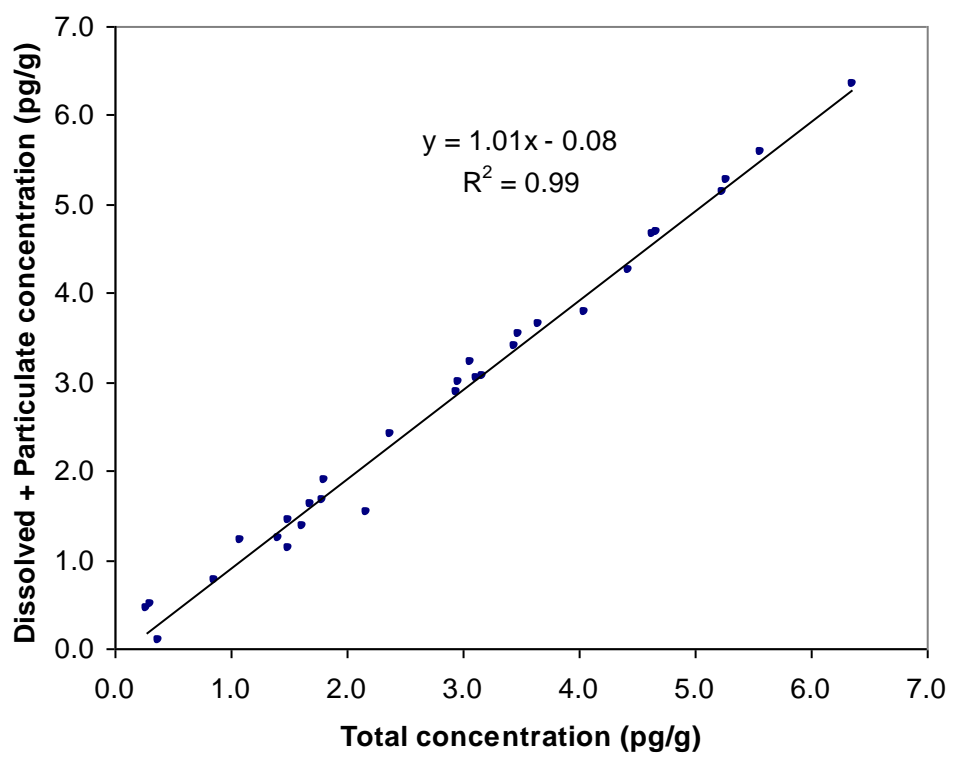

**Figure S1**
